# Supplementary material
Source: PubMed Central journal article supplement (PMC3156185)
Supplement: 1105627108_pnas.201105627SI.pdf [file 1105627108_pnas.201105627SI.pdf]

# Supporting Information

Garcia-Alles et al. 10.1073/pnas.1105627108

## SI Materials and Methods

**Reagents and Cell Lines.** Recombinant HLA-A2 in complex with the melan A peptide (ELAGIGILTV) was purchased from the Recombinant Protein Platform (Institut National de la Santé et de la Recherche Médicale). Bovine brain sulfatides (cerebroside sulfates, sulfatides) was purchased from Sigma and the tripalmitoylated lipopeptide Pam<sub>3</sub>CSK<sub>4</sub> from InvivoGen. All other commercial lipids were from Avanti Polar Lipids. *Mycobacterium tuberculosis* diacylated sulfolipids were purified according to published protocols (1, 2), and the synthetic sulfolipid (SGL) analogs SGL1 and SGL12 were prepared as previously described (3). To prepare lipid vesicles, single lipids or mixtures of lipids in chloroform/MeOH were dried under a N<sub>2</sub> flow in glass tubes, and the residue was rehydrated with periodic agitation for 1 h at room temperature in the water volume required to obtain 0.5- to 5-mM stock solutions, which were then submitted to 10 freeze-thaw cycles and 10 min of bath sonication.

Recombinant soluble CD1e (including the N-terminal pro-peptide) and CD1b were expressed in, respectively, S2 *Drosophila* cells and mouse J558 cells and purified as described previously (4, 5). Recombinant soluble CD1a was expressed exactly like rsCD1b and purified by affinity chromatography using an agarose-conjugated antibody recognizing the BirA-peptide (Avidity). Saposins A–C were prepared in *Escherichia coli* and purified according to a published protocol (6).

**Lipid Binding to CD1 Molecules.** Briefly, 6- to 10- $\mu$ g aliquots of rsCD1e-2, scCD1e, or rsCD1b at 5–20  $\mu$ M final concentration were shaken in glass vials at 800 rpm and 30 °C for the time indicated (typically, 30–120 min) in the presence of liposomes containing the specified single lipid or mixture of lipids (100–200  $\mu$ M) in 50 mM sodium acetate (pH 5.0) containing 50 mM NaCl, 1 mM DTT, and 1 mM EDTA. Sodium acetate was replaced by Hepes for incubations at neutral pH. Experiments with rsCD1b were also carried out in the presence of CD1e or protein controls at 20  $\mu$ M final concentration (or as noted in the legends for Fig. 3 and Fig. S6). After the indicated time, the samples were cooled on ice and 2- $\mu$ L aliquots were applied to an isoelectric focusing (IEF) gel. Electrophoresis was performed in a PhastGel system (Amersham Biosciences) for 600 AVh (accumulated volt hours). Proteins in the gels were detected by staining with Coomassie R 350. The gels were scanned on a GS-800 calibrated densitometer (Bio-Rad), and protein bands were quantified using the Quantity One 4.6.3 software program (Bio-Rad) after subtraction of the background.

**Native Nano Electrospray Ionization (ESI) Mass Spectrometry.** Before MS experiments, a sample of fully deglycosylated scCD1e was buffer-exchanged extensively against 50 mM aqueous ammonium acetate (pH 6.7) using 5-kDa centrifuge filters (Millipore). Other details concerning the instrumentation and procedure are exactly as described in ref. 5.

**Structure Determination, Analysis, and Presentation.** A crystal was immersed for 1 min in 0.4  $\mu$ L of crystallization solution supplemented with 20 mM Na acetate and 20% ethyleneglycol before being flash-frozen in liquid nitrogen. Diffracted intensities were collected from this single crystal at the European Synchrotron Radiation Facility (Grenoble, France) on the beamline ID14 EH4, tuned to 0.9295 Å, using an ADSC CCD detector. The diffraction images were processed using MOSFLM (7), scaled with SCALA (8), and further processed with the CCP4 program package (9). Data processing statistics are summarized in Table S1. The crystals belonged to the monoclinic space group C2 ( $a = 206.29$  Å,  $b = 45.93$  Å,  $c = 65.63$  Å,  $\beta = 91.48^\circ$ ) and contained a single  $\beta$ 2-microglobulin ( $\beta$ 2m)-CD1e molecule per asymmetric unit.

The structure was solved by the molecular replacement method using the program PHASER (10), feeding independently the two polypeptide chains from a CD1e structure built on a homology model (4). A single unambiguous solution was obtained with a Z-score of 15.6 for data between 51.6 and 3.5 Å resolution. This solution was refined with REFMAC (11) using data between 51.6 and 2.90 Å resolution. The  $F_o - F_c$  electron density maps allowed us to model a Fuc( $\alpha$ 1-6)-GlcNAc group onto the heavy chain Asn16. Translation libration screw-motion (TLS) parameters were refined for each polypeptidic chain. The final model includes 375 residues, 2 sugar moieties, and 1 glycerol. Statistics of the final refined structure are given in Table S1. Ramachandran analysis showed 245 residues in preferred regions (77%), 61 in allowed regions (19%), 7 residues in generously allowed regions (2%), and 5 outliers (1.6%). The protein stereochemistry was validated using PROCHECK (12).

Molecular surface areas and volumes were calculated using the CASTp server (13). A solvent probe of 1.7 Å was used to map the internal cavities and pockets of the proteins. Fig. 1 and Figs. S3 and S4 were generated with The PyMOL Molecular Graphics System (2002) (DeLano Scientific) and Hollow (14).

- Gilleron M, et al. (2001) Acylation state of the phosphatidylinositol mannosides from *Mycobacterium bovis* bacillus Calmette Guerin and ability to induce granuloma and recruit natural killer T cells. *J Biol Chem* 276:34896–34904.
- Gilleron M, et al. (2004) Diacylated sulfolipids are novel mycobacterial antigens stimulating CD1-restricted T cells during infection with *Mycobacterium tuberculosis*. *J Exp Med* 199:649–659.
- Guiard J, et al. (2008) Synthesis of diacylated trehalose sulfates: Candidates for a tuberculosis vaccine. *Angew Chem Int Ed Engl* 47:9734–9738.
- de la Salle H, et al. (2005) Assistance of microbial glycolipid antigen processing by CD1e. *Science* 310:1321–1324.
- Garcia-Alles LF, et al. (2006) Endogenous phosphatidylcholine and a long spacer ligand stabilize the lipid-binding groove of CD1b. *EMBO J* 25:3684–3692.
- Qi X, Grabowski GA (2001) Differential membrane interactions of saposins A and C: Implications for the functional specificity. *J Biol Chem* 276:27010–27017.
- Leslie AGW (1987) Computational aspects of protein crystal data analysis. *Proceedings of the Daresbury Study Weekend*, eds Helliwell JR, Machin PA, Papiz MZ (Science and Engineering Research Council, Daresbury Laboratory, Warrington, UK), pp 39–50.
- Evans PR (1993) Data collection and processing. *Proceedings of the CCP4 Study Weekend* (Science and Engineering Research Council, Daresbury Laboratory, Warrington, UK), pp 114–122.
- Collaborative Computational Project, Number 4 (1994) The CCP4 Suite: Programs for protein crystallography. *Acta Crystallogr D Biol Crystallogr* 50:760–763.
- McCoy AJ, Grosse-Kunstleve RW, Storoni LC, Read RJ (2005) Likelihood-enhanced fast translation functions. *Acta Crystallogr D Biol Crystallogr* 61:458–464.
- Murshudov GN, Vagin AA, Dodson EJ (1997) Refinement of macromolecular structures by the maximum-likelihood method. *Acta Crystallogr D Biol Crystallogr* 53:240–255.
- Laskowski RA, MacArthur MW, Moss DS, Thornton JM (1993) PROCHECK: A program to check the stereochemical quality of protein structures. *J Appl Cryst* 26:283–291.
- Liang J, Edelsbrunner H, Woodward C (1998) Anatomy of protein pockets and cavities: Measurement of binding site geometry and implications for ligand design. *Protein Sci* 7:1884–1897.
- Ho BK, Gruswitz F (2008) HOLLOW: Generating accurate representations of channel and interior surfaces in molecular structures. *BMC Struct Biol* 8:49.







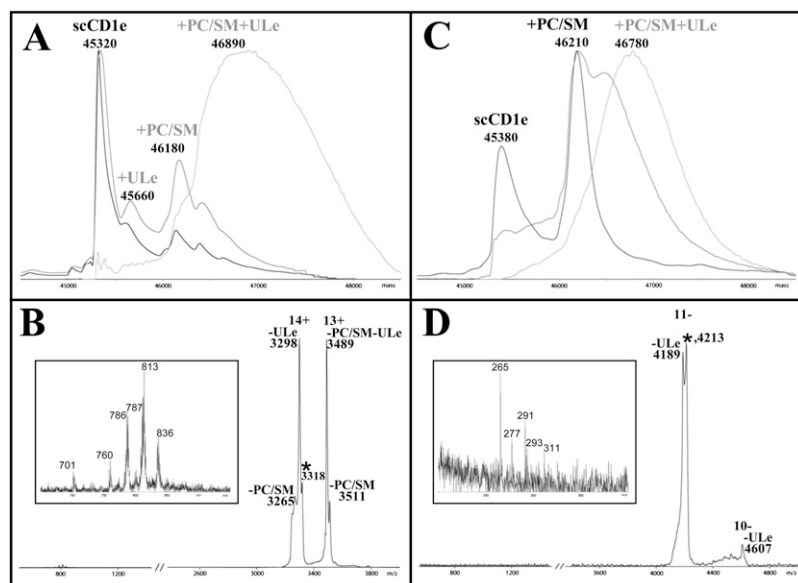

**Fig. S5.** Endogenous ligands associated with scCD1e. (A) Convoluted “neutralized” mass spectrum obtained by averaging over the charged states detected in positive-ion mode native ESI-MS of fully deglycosylated scCD1e. Masses originating from apo-scCD1e, scCD1e-ULe, scCD1e-phosphatidylcholine (PC)/sphingomyelin (SM), and scCD1e-PC/SM-ULe are labeled. The first spectrum was recorded using high desolvation energy (black line) and the two other spectra at progressively decreasing energies (dark gray and light gray lines, respectively). Decreasing the desolvation energy prevents ligand dissociation but causes a broadening of the signals and displacement of the peaks toward higher-molecular-weight values due to the heterogeneous association of water and other small molecules. (B) Tandem MS after selection of  $14^+$  precursor ions at  $3,318\text{ m/z}$  corresponding to a presumed scCD1e-PC/SM-ULe species (asterisk). Products appearing inside the  $3,200$ - to  $3,600\text{-m/z}$  interval originate from the dissociation of either PC or SM ( $-PC/SM$ ); the loss of  $280\text{ Da}$ , which might correspond to a spacer molecule ( $-ULe$ ); or the simultaneous loss of PC/SM and ULe. Signals corresponding to PC ( $m/z\ 760.6, 786.6, 812.6, 836.6$ ) and SM ( $701.7, 787.7, 813.7$ ), but not to ULe, were detected in the low-mass range of this spectrum. (Inset) The enlarged  $650$ - to  $950\text{-m/z}$  region. (C) Convoluted “neutralized” mass spectrum obtained by averaging over the charged states detected in negative-ion mode in native ESI-MS of fully deglycosylated scCD1e. Other details are as for A. (D) Tandem MS after selecting  $11^-$  precursor ions at  $4,213\text{ m/z}$ , which are attributed to scCD1e-PC/SM-ULe species (asterisk). The observed dissociation products correspond to loss of neutral or negatively charged species of  $260$ - $270\text{ Da}$ . (Inset) An enlarged  $200$ - to  $400\text{-m/z}$  region of a second spectrum recorded at higher collision energy. Low-intensity peaks are detected, which could correspond to fatty acids:  $m/z\ 265\ (C_{17:2}), 277\ (C_{18:3}), 291\ (C_{19:3}), 293\ (C_{19:2}),$  and  $311\ (C_{20:0})$ .



**Table S1. Data collection and refinement statistics**

|                                    |                         |
|------------------------------------|-------------------------|
| Data collection                    |                         |
| Space group                        | C2                      |
| Cell dimensions                    |                         |
| <i>a</i> , <i>b</i> , <i>c</i> (Å) | 206.29, 45.93, 65.63    |
| $\alpha$ , $\beta$ , $\gamma$ (°)  | 90.0, 91.48, 90.0       |
| Resolution (Å)                     | 103.11–2.90 (3.06–2.90) |
| $R_{\text{sym}}$                   | 0.063 (0.372)           |
| $I/\sigma$                         | 7.0 (1.7)               |
| Completeness (%)                   | 94.7 (96.7)             |
| Redundancy                         | 2.0 (2.0)               |
| Refinement                         |                         |
| Resolution (Å)                     | 51.55–2.90              |
| No. reflections                    | 12,460                  |
| $R_{\text{work}}/R_{\text{free}}$  | 0.2408/0.2955           |
| No. atoms                          | 2898                    |
| Protein                            | 2868                    |
| Glycan                             | 24                      |
| Glycerol                           | 6                       |
| Average B-factors                  |                         |
| From Wilson statistics             | 79.9                    |
| Protein                            | 87.7                    |
| Glycan                             | 83.7                    |
| Glycerol                           | 66.4                    |
| rmsd                               |                         |
| Bond lengths (Å)                   | 0.017                   |
| Bond angles (°)                    | 1.832                   |

---

Values in parentheses are for the highest-resolution shell.
